# Supplementary material
Source: publisher site journal article supplement (https://www.dovepress.com/article/606971)
Supplement: Supplementary file 1 [file Supplementary%20file%20.docx]

**Supplementary file 1:** Search Strategy (Pubmed)

**Supplementary file 2:** Basic characteristics of the included studies

**Supplementary file 3:**Assessment of inconsistency results

**Supplementary file 4:**Assessment of convergence of the model results

**Supplementary file 5:** Ranking of SUCRA Values for Improvement in VAS Scores with Acupuncture Therapy Combined with Core Stability Training

**Supplementary File 1:** Search Strategy (Pubmed)

| **Steps** | **Search** |
| --- | --- |
| #1 | low back pain[MeSH Terms] OR low back pain[Title/Abstract] OR Back Pain, Low[Title/Abstract] OR Back Pains, Low[Title/Abstract] OR Low Back Pains[Title/Abstract] OR Pain, Low Back[Title/Abstract] OR Pains, Low Back[Title/Abstract] OR Low Back Ache[Title/Abstract] OR Ache, Low Back[Title/Abstract] OR Aches, Low Back[Title/Abstract] OR Back Ache, Low[Title/Abstract] OR Back Aches, Low[Title/Abstract] OR Low Back Aches[Title/Abstract] OR Low Backache[Title/Abstract] OR Backache, Low[Title/Abstract] OR Backaches, Low[Title/Abstract] OR Low Backaches[Title/Abstract] OR Lower Back Pain[Title/Abstract] OR Back Pain, Lower[Title/Abstract] OR Back Pains, Lower[Title/Abstract] OR Lower Back Pains[Title/Abstract] OR Pain, Lower Back[Title/Abstract] OR Pains, Lower Back[Title/Abstract] OR Lumbago[Title/Abstract] OR Low Back Pain, Mechanical[Title/Abstract] OR Mechanical Low Back Pain[Title/Abstract] OR Low Back Pain, Posterior Compartment[Title/Abstract] OR Low Back Pain, Postural[Title/Abstract] OR Postural Low Back Pain[Title/Abstract] OR Low Back Pain, Recurrent[Title/Abstract] OR Recurrent Low Back Pain[Title/Abstract] |
| #2 | acupuncture[MeSH Terms] OR Acupuncture[Title/Abstract] OR Pharmacopuncture[Title/Abstract] OR acupuncture therapy[MeSH Terms] OR acupuncture therapy[Title/Abstract] OR acupuncture Treatment[Title/Abstract] OR Acupuncture Treatments[Title/Abstract] OR Treatment, Acupuncture[Title/Abstract] OR Therapy, Acupuncture[Title/Abstract] OR Pharmacoacupuncture Treatment[Title/Abstract] OR Treatment, Pharmacoacupuncture[Title/Abstract] OR Pharmacoacupuncture Therapy[Title/Abstract] OR Therapy, Pharmacoacupuncture[Title/Abstract] OR Acupotomy[Title/Abstract] OR Acupotomies[Title/Abstract] OR Acupuncture, Ear[MeSH Terms] OR Acupuncture, Ear[Title/Abstract] OR Acupunctures, Ear[Title/Abstract] OR Ear Acupunctures[Title/Abstract] OR Acupuncture, Auricular[Title/Abstract] OR Acupunctures, Auricular[Title/Abstract] OR Auricular Acupunctures[Title/Abstract] OR Auricular Acupuncture[Title/Abstract] OR Ear Acupuncture[Title/Abstract] OR electroacupuncture[MeSH Terms] OR electroacupuncture[Title/Abstract] OR moxibustion[MeSH Terms] OR moxibustion[Title/Abstract] OR moxabustion[Title/Abstract] OR Acupuncture Analgesia[MeSH Terms] OR Acupuncture Analgesia[Title/Abstract] OR Analgesia, Acupuncture[Title/Abstract] OR Acupuncture Anesthesia[Title/Abstract] OR Anesthesia, Acupuncture[Title/Abstract] OR Meridians[MeSH Terms] OR Meridians[Title/Abstract] OR Jing Luo[Title/Abstract] OR Luo, Jing[Title/Abstract] OR Jingluo[Title/Abstract] OR Ching Lo[Title/Abstract] OR Acupuncture Points[MeSH Terms] OR Acupuncture Points[Title/Abstract] OR Acupuncture Point[Title/Abstract] OR Point, Acupuncture[Title/Abstract] OR Points, Acupuncture[Title/Abstract] OR Acupoints[Title/Abstract] OR Acupoint[Title/Abstract] OR fire needle[Title/Abstract] OR warm needle[Title/Abstract] OR auricular needle[Title/Abstract] OR ear needle[Title/Abstract] OR needle-knife[Title/Abstract] |
| #3 | physical therapy modalities[MeSH Terms] OR physical therapy modalities[Title/Abstract] OR Modalities, Physical Therapy[Title/Abstract] OR Modality, Physical Therapy[Title/Abstract] OR Physical Therapy Modality[Title/Abstract] OR Physical Therapy Techniques[Title/Abstract] OR Physical Therapy Technique[Title/Abstract] OR Techniques, Physical Therapy[Title/Abstract] OR Physiotherapy Techniques[Title/Abstract] OR Physiotherapies Techniques[Title/Abstract] OR Neurological Physiotherapy[Title/Abstract] OR Physiotherapy, Neurological[Title/Abstract] OR Neurophysiotherapy[Title/Abstract] OR Group Physiotherapy[Title/Abstract] OR Group Physiotherapies[Title/Abstract] OR Physiotherapies, Group[Title/Abstract] OR Physiotherapy, Group[Title/Abstract] OR Physical Therapy[Title/Abstract] OR Physical Therapies[Title/Abstract] OR Therapy, Physical[Title/Abstract] OR exercise therapy[MeSH Terms] OR exercise therapy[Title/Abstract] OR Rehabilitation Exercise[Title/Abstract] OR Exercise, Rehabilitation[Title/Abstract] OR Exercises, Rehabilitation[Title/Abstract] OR Rehabilitation Exercises[Title/Abstract] OR Therapy, Exercise[Title/Abstract] OR Exercise Therapies[Title/Abstract] OR Therapies, Exercise[Title/Abstract] OR Remedial Exercise[Title/Abstract] OR Exercise, Remedial[Title/Abstract] OR Exercises, Remedial[Title/Abstract] OR Remedial Exercises[Title/Abstract] OR Core Stability[MeSH Terms] OR Core Stability[Title/Abstract] OR Stability, Core[Title/Abstract] OR Core Balance[Title/Abstract] OR Balance, Core[Title/Abstract] OR Exercise Movement Techniques[MeSH Terms] OR Exercise Movement Techniques[Title/Abstract] OR Movement Techniques, Exercise[Title/Abstract] OR Exercise Movement Technics[Title/Abstract] OR Pilates-Based Exercises[Title/Abstract] OR Exercises, Pilates-Based[Title/Abstract] OR Pilates Based Exercises[Title/Abstract] OR Pilates Training[Title/Abstract] OR Training, Pilates[Title/Abstract] OR (sports[Title/Abstract]) OR (physiotherap*[Title/Abstract]) OR exercis*[Title/Abstract] OR training[Title/Abstract] |
| #4 | randomized controlled trial [pt] OR controlled clinical trial [pt] OR randomized [Title/Abstract] OR placebo [Title/Abstract] OR randomly [Title/Abstract] OR trial [Title/Abstract] OR groups [Title/Abstract] NOT (animals [mh] NOT humans [mh]) |
| #5 | English[Language] OR Chinese[Language] |
| #6 | #1 AND #2 AND #3 AND #4 AND #5 |

| **Supplementary File 2:** Basic characteristics of the included studies | | | | | | | | | |
| --- | --- | --- | --- | --- | --- | --- | --- | --- | --- |
| Study ID | Number of Subjects（male、female） | | Age（xˉ±s）(y) | | Disease Course | | Intervention Measures* | | Outcome Indicators |
| Treatment Group | Control Group | Treatment Group | Control Group | Treatment Group | Control Group | Treatment Group | Control Group |
| Du Ying 2024[52] | 58（35/23） | 57（33/24） | 51.79±11.48 | 53.26±10.69 | 1.65±0.48(y) | 1.70±0.46(y) | AT+CST | CST | VAS;Efficacy |
| Fan Hongxia 2018[32] | 46（26/20） | 57（27/19） | 38.1±3.5 | 37.6±3.8 | 16.6±4.7(m) | 17.8±5.1(m) | AT+CST | AT | VAS; |
| Huang Jinghua 2019[41] | 30（19/11） | 30（18/12） | 27.44±4.29 | 27.23±4.13 | 10.36±3.43(m) | 10.92±3.29(m) | AT+CST | CST | VAS;ODI;Efficacy |
| Lei Ye 2021[54] | 42（23/19） | 42（24/18） | 42.63±9.60 | 41.45±10.23 | 11.20±5.61(m) | 11.25±5.53(m) | AT+CST | AT | VAS;ODI |
| Li Honger 2025[30] | 51（25/26） | 51（29/22） | 65.21±4.83 | 64.95±5.59 | 4.31±1.57(m) | 4.26±1.69(m) | AT+CST | CST | VAS;ODI |
| Li Huifeng 2022[34] | 41（23/18） | 41（24/17） | 40.62±2.37 | 40.51±2.25 | 8.26±1.53(m) | 8.13±1.41(m) | AT+CST | CST | VAS;ODI;Efficacy |
| Li Li 2012[51] | 30（NA） | 30（NA） | NA | NA | NA | NA | AT+CST | AT | VAS;ODI |
| Li Shuwen 2020[24] | 30（15/15） | 30（17/13） | 48.1±8.6 | 47.6±7.2 | 8.67±3.44(m) | 9.20±4.10(m) | AT+CST | CST | VAS;ODI;Efficacy |
| Liu bin 2020[46] | 40（21/19） | 38（17/21） | 49.70±7.13 | 47.05±8.35 | 29.93±13.94(m) | 26.89±16.07(m) | AT+CST | CST | VAS;ODI |
| Liu Chang 2021[49] | 42（20/22） | 42（18/24） | 36.64±7.59 | 36.59±7.82 | 30.27±11.09(m) | 33.59±13.80(m) | AT+CST | CST | VAS;ODI;Efficacy |
| Liu Hongju 2015[31] | 32（20/12） | 32（15/17） | 39.43±5.35 | 39.75±5.62 | 23.92±18.53(m) | 24.13±18.47(m) | AT+CST | AT | VAS;ODI |
| Ren Xiangxiang 2020[44] | 40（16/24） | 40（18/22） | 45.2±3.3 | 45.9±3.8 | 17.3±6.1(m) | 16.8±5.6(m) | AT+CST | CST | VAS;ODI |
| Song Tingwei 2022[26] | 30（19/11） | 30（17/13） | 43.21±3.34 | 45.24±3.28 | 1.46±0.36(y) | 1.48±0.34(y) | AT+CST | CST | VAS;ODI;Efficacy |
| Wang Aihong 2022[47] | 31（15/16） | 31（14/17） | 50.89±11.92 | 50.13±11.42 | 7.91±2.34(m) | 7.42±2.13(m) | AT+CST | CST | VAS |
| Wang Hongyu 2024[27] | 30（15/15） | 30（13/17） | 44. 23±12. 94 | 45. 53±11. 12 | 30. 43±17. 87(m) | 37. 5±18. 66(m) | AT+CST | CST | VAS;Efficacy |
| Wang Meiyun 2022[45] | 63（30/33） | 63（35/28） | 39.85±4.28 | 40.12±4.27 | 11.46±3.39(m) | 11.35±3.50(m) | AT+CST | CST | VAS;ODI |
| Wei Yingli 2024[40] | 49（20/29） | 49（22/27） | 46.11±7.23 | 45.23±7.14 | 25.06±6.39(m) | 24.75±6.33(m) | AT+CST | CST | VAS;ODI;JOA;Efficacy |
| Yang Fei 2023[33] | 30（14/16） | 30（17/13） | 41.68±6.23 | 41.82±5.98 | 18.36±2.68(w) | 18.42±1.28(w) | AT+CST | CST | VAS;JOA;Efficacy |
| Yang Wei 2024[28] | 30（17/13） | 30（18/12） | 55.55±2.02 | 55.44±2.84 | 29.55±2.39(m) | 29.53±1.47(m) | AT+CST | AT | VAS;Efficacy |
| Zhai Yongyi 2021[43] | 37（NA） | 37（NA） | 37.28±9.14 | 36.87±8.54 | 13.08±5.32(m) | 12.87±4.08(m) | AT+CST | AT | VAS;ODI |
| Zhang yingjie 2024[39] | 77（36/41） | 77（39/38） | 38. 69±3. 70 | 38. 77±3. 61 | 20. 31±4. 21(m) | 20. 28±4. 29(m) | AT+CST | CST | VAS;JOA;Efficacy |
| Zhou Yuda 2022[37] | 23（15/8） | 23（13/10） | 43.23±9.51 | 43.23±9.51 | 6.72±2.17(m) | 6.07±1.26(m) | AT+CST | AT | VAS;ODI |
| Zhu Wenli 2016[50] | 30（16/14） | 30（18/12） | 47.23±2.30 | 48.60±1.90 | 6.41±0.8(m) | 7.13±0.27(m) | AT+CST | AT | VAS;JOA |
| Li Shaokang 2022[23] | 35(20/25） | 35（22/13） | 42.8±9.7 | 41.7±9.5 | 42.7±8.9(m) | 41.9±9.2(m) | AT+CST | CST | VAS;ODI;Efficacy |
| Cao Shuqi 2019[35]** | 46（28/18） | A:46（26/20） | 36.29±4.61 | A:36.25±5.30 | 15.94±5.08(m) | A:15.68±5.23(m) | AT+CST | AT | VAS;Efficacy |
| C:43（25/21） | C:36.95±4.40 | C:14.98±5. 17(m) | CST |
| Cheng Y 2023[53]** | 30（16/14） | A:30（14/16） | 38.73±10.39 | A:40.17±10.67 | 22.40±8.21(m) | A:21.07±9.04(m) | AT+CST | AT | VAS;ODI;Efficacy |
| C:30（18/12） | C:39.96±10.42 | C:20.93±9.12(m) | CST |
| Gao Kaiqian 2023[48]** | 50（21/29） | A:50（27/23） | 48.6±9.9 | A:44.3±9.4 | 11. 5(7. 4-16. 0)(y)*** | A:14. 3(9. 1-17. 7)(y)*** | AT+CST | AT | VAS;JOA |
| C:50（20/30） | C:47.6±9.9 | C:13. 1(8. 0-17. 3)(y)*** | CST |
| Li Ruijie 2018[36]** | 30（19/11） | A:29（17/12） | 36.29±4.61 | A:36.25±5.30 | 15.94±5.08(m) | A:15.68±5.23(m) | AT+CST | AT | VAS;Efficacy |
| C:29（16/13） | C:36.95±4.40 | C:14.98±5.17(m) | CST |
| Liao Junming 2019[42]** | 30（NA） | A:30（NA） | 41.6±5.01 | A:41.67±7.02 | 35.07±1.59(m) | A:31.83±7.94(m) | AT+CST | AT | VAS;ODI;Efficacy |
| C:30（NA） | C:42.43±4.78 | C:37.17±8.96(m) | CST |
| Liu Pan 2012[29]** | 20（9/11） | A:20（8/12） | 44.60±10.59 | A:46.73±11.58 | 64.23±14.60(m) | A:67.43±13.55(m) | AT+CST | AT | VAS;JOA |
| C:20（10/10） | C:43.28±10.34 | C:66.78±14.57(m) | CST |
| Liu Xiyuan 2023[38]** | A1+C:34（20/14） | 34（19/15） | A1+C:39.60±9.945 | 41.29±11.580 | A1+C:21.40±11.033(m) | 18.71±8.688(m) | AT+CST | CST | VAS;ODI;JOA;Efficacy |
| A2+C:33（12/21） | A2+C:44.31±12.254 | A2+C:20.66±11.100(m) | AT+CST |
| Shu Chang 2019[25]** | 29（12/17） | A:29（13/16） | 48.06±9.71 | A:49.21±10.15 | 6.04±1.73(m) | A:6.16±2.17(m) | AT+CST | AT | VAS;ODI;JOA |
| C:28（12/16） | C:48.34±9.21 | C:5.97±2.02(m) | CST |

*: AT: Acupuncture Therapy; CST: Core Stability Training

**: Three-arm study

***: Median (25th percentile, 75th percentile)

**Supplementary File 3:** Assessment of inconsistency results

| Name | Direct Effect | Indirect Effect | Overall | P-Value |
| --- | --- | --- | --- | --- |
| 1, 7 | -0.20 (-1.05, 0.64) | 1.13 (0.11, 2.16) | -1.34 (-2.67, -0.01) | 0.06 |
| 1, 9 | -0.42 (-1.15, 0.30) | -1.00 (-2.86, 0.85) | 0.58 (-1.41, 2.57) | 0.57 |
| 1, 15 | -0.70 (-1.34, -0.06) | -1.75 (-3.64, 0.14) | 1.05 (-0.94, 3.04) | 0.30 |
| 2, 6 | -0.37 (-1.14, 0.41) | -0.43 (-2.17, 1.31) | 0.06 (-1.85, 1.97) | 0.95 |
| 2, 10 | -1.07 (-1.70, -0.43) | -0.28 (-3.22, 2.67) | -0.79 (-3.79, 2.21) | 0.61 |
| 2, 16 | -0.76 (-1.47, -0.05) | -1.93 (-60.23, 56.36) | 1.17 (-57.13, 59.47) | 0.97 |
| 3,8 | 0.47 (-0.83, 1.77) | 0.34 (-38.45, 39.13) | 0.13 (-38.68, 38.94) | 1.00 |
| 3, 11 | -1.14 (-2.20, -0.08) | -1.06 (-36.10, 33.98) | -0.08 (-35.14, 34.97) | 1.00 |
| 3, 19 | -1.49 (-2.62, -0.36) | -1.72 (-74.16, 70.72) | 0.23 (-72.22, 72.68) | 1.00 |
| 4, 7 | 0.70 (-0.38, 1.79) | -0.58 (-1.99, 0.83) | 1.29 (-0.50, 3.07) | 0.16 |
| 4, 12 | -0.87 (-1.86, 0.12) | -0.28 (-2.04, 1.49) | -0.59 (-2.62, 1.43) | 0.57 |
| 4, 17 | -1.89 (-2.96, -0.82) | -1.17 (-3.08, 0.74) | -0.72 (-2.91, 1.46) | 0.52 |
| 5, 7 | 0.41 (-0.65, 1.47) | -0.70 (-119.73, 118.32) | 1.11 (-117.91, 120.14) | 0.99 |
| 5, 18 | -1.83 (-3.82, 0.16) | -1.50 (-25694.84, 25691.85) | -0.33 (-25693.68, 25693.01) | 1.00 |
| 6, 9 | -1.13 (-1.70, -0.57) | -0.55 (-2.47, 1.37) | -0.58 (-2.58, 1.41) | 0.57 |
| 6, 10 | -0.68 (-1.34, -0.03) | -0.17 (-2.83, 2.49) | -0.51 (-3.25, 2.22) | 0.71 |
| 6, 11 | -1.35 (-2.05, -0.65) | -1.34 (-28.82, 26.14) | -0.01 (-27.50, 27.48) | 1.00 |
| 6, 12 | -1.13 (-1.91, -0.36) | -1.72 (-3.59, 0.14) | 0.59 (-1.43, 2.61) | 0.57 |
| 6, 13 | -0.95 (-1.98, 0.08) | -1.17 (-100.37, 98.03) | 0.22 (-98.99, 99.43) | 1.00 |
| 6, 14 | -1.04 (-1.62, -0.46) | -1.17 (-50.21, 47.87) | 0.13 (-48.91, 49.17) | 1.00 |
| 7, 15 | -1.16 (-1.83, -0.48) | -0.87 (-2.77, 1.04) | -0.29 (-2.30, 1.72) | 0.78 |
| 7, 17 | -1.99 (-2.75, -1.24) | -0.81 (-4.75, 3.14) | -1.19 (-5.22, 2.85) | 0.57 |
| 7, 18 | -2.24 (-3.27, -1.21) | -1.13 (-120.14, 117.89) | -1.11 (-120.14, 117.91) | 0.99 |
| 8, 19 | -1.96 (-3.20, -0.72) | -1.69 (-81.28, 77.90) | -0.27 (-79.88, 79.34) | 1.00 |
| 8, 20 | -1.36 (-2.12, -0.60) | -1.63 (-81.23, 77.98) | 0.27 (-79.34, 79.87) | 1.00 |

**Supplementary File 4:**Assessment of convergence of the model results

| Parameter | PSRF |
| --- | --- |
| d.1.15 | 1.00 |
| d.11.3 | 1.00 |
| d.12.4 | 1.00 |
| d.2.16 | 1.00 |
| d.3.19 | 1.00 |
| d.3.8 | 1.00 |
| d.4.17 | 1.00 |
| d.4.7 | 1.00 |
| d.6.10 | 1.00 |
| d.6.11 | 1.00 |
| d.6.12 | 1.00 |
| d.6.13 | 1.00 |
| d.6.14 | 1.00 |
| d.6.2 | 1.00 |
| d.6.9 | 1.00 |
| d.7.18 | 1.00 |
| d.7.5 | 1.00 |
| d.8.20 | 1.00 |
| d.9.1 | 1.00 |
| sd.d | 1.00 |

| **Supplementary File 5:** Ranking of SUCRA Values for Improvement in VAS Scores with Acupuncture Therapy Combined with Core Stability Training | | | |
| --- | --- | --- | --- |
| **Intervention ID** | **Intervention Name** | **SUCRA Value (%)** | **Rank** |
| 1 | Acupuncture | 43.4 | 12 |
| 2 | Electroacupuncture | 7.2 | 20 |
| 3 | Acupotomy | 25.7 | 17 |
| 4 | Specialized acupuncture techniques | 37 | 15 |
| 5 | Moxibustion | 46.6 | 11 |
| 6 | Traditional core stability training | 15.2 | 19 |
| 7 | Unstable surface training | 29 | 16 |
| 8 | Comprehensive core training | 16 | 18 |
| 9 | Acupuncture + Traditional core stability training | 66.7 | 6 |
| 10 | Electroacupuncture + Traditional core stability training | 39.8 | 13 |
| 11 | Acupotomy + Traditional core stability training | 68.9 | 5 |
| 12 | Specialized acupuncture techniques + Traditional core stability training | 65.7 | 7 |
| 13 | Auricular acupressure + Traditional core stability training | 52.1 | 10 |
| 14 | Moxibustion + Traditional core stability training | 56.2 | 9 |
| 15 | Acupuncture + Unstable surface training | 74.8 | 4 |
| 16 | Electroacupuncture + Unstable surface training | 37.5 | 14 |
| 17 | Specialized acupuncture techniques + Unstable surface training | 92.1 | 2 |
| 18 | Moxibustion + Unstable surface training | 94.7 | 1 |
| 19 | Acupotomy + Comprehensive core training | 75.1 | 3 |
| 20 | Specialized acupuncture techniques + Comprehensive core training | 56.5 | 8 |
